# Supplementary material
Source: publisher figshare collection journal article supplement (https://acs.figshare.com/ndownloader/files/4703905)
Supplement: Supplementary file 1 [file 4703905]

data_spang16
 
_audit_creation_date
;
'Wed Nov 08 16:01:49 2006'
;
_audit_creation_method
;
CrysAlis RED, Oxford Diffraction Ltd.,
Version 1.171.30.5 (release 12-06-2006 CrysAlis171 .NET)
(compiled Jun 12 2006,17:01:16)
;
_chemical_name_systematic
;
 ?
;
_chemical_name_common             ?
_chemical_melting_point           ?
_chemical_formula_moiety          ?
_chemical_formula_sum
 'C20 H23 B O2'
_chemical_formula_weight          306.19
 
loop_
 _atom_type_symbol
 _atom_type_description
 _atom_type_scat_dispersion_real
 _atom_type_scat_dispersion_imag
 _atom_type_scat_source
 'C'  'C'   0.0181   0.0091
 'International Tables Vol C Tables 4.2.6.8 and 6.1.1.4'
 'H'  'H'   0.0000   0.0000
 'International Tables Vol C Tables 4.2.6.8 and 6.1.1.4'
 'O'  'O'   0.0492   0.0322
 'International Tables Vol C Tables 4.2.6.8 and 6.1.1.4'
 'B'  'B'   0.0090   0.0039
 'International Tables Vol C Tables 4.2.6.8 and 6.1.1.4'
 
_symmetry_cell_setting            'tetragonal'
_symmetry_space_group_name_H-M    'P4(2)/n'
 
loop_
 _symmetry_equiv_pos_as_xyz
 'x, y, z'
 '-x+1/2, -y+1/2, z'
 '-y, x+1/2, z+1/2'
 'y+1/2, -x, z+1/2'
 '-x, -y, -z'
 'x-1/2, y-1/2, -z'
 'y, -x-1/2, -z-1/2'
 '-y-1/2, x, -z-1/2'
 
_cell_length_a                    33.335(5)
_cell_length_b                    33.343(4)
_cell_length_c                    6.1898(8)
_cell_angle_alpha                 90.00
_cell_angle_beta                  90.00
_cell_angle_gamma                 90.00
_cell_volume                      6879.9(16)
_cell_formula_units_Z             16
_cell_measurement_temperature     100
_cell_measurement_reflns_used     12721
_cell_measurement_theta_min       3.7210
_cell_measurement_theta_max       60.4000
 
_exptl_crystal_description        needle
_exptl_crystal_colour             colourless
_exptl_crystal_size_max           0.8
_exptl_crystal_size_mid           0.05
_exptl_crystal_size_min           0.05
_exptl_crystal_density_meas       ?
_exptl_crystal_density_diffrn     1.182
_exptl_crystal_density_method     'not measured'
_exptl_crystal_F_000              2624
_exptl_absorpt_coefficient_mu     0.573
_exptl_absorpt_correction_type    'multi-scan'
_exptl_absorpt_correction_T_min   0.77046
_exptl_absorpt_correction_T_max   1.00000
_exptl_absorpt_process_details
;
CrysAlis RED, Oxford Diffraction Ltd.,
Version 1.171.30.5 (release 12-06-2006 CrysAlis171 .NET)
(compiled Jun 12 2006,17:01:16)
Empirical absorption correction using spherical harmonics,
 implemented in SCALE3 ABSPACK scaling algorithm.
;
 
_exptl_special_details
;
 ?
;
 
_diffrn_ambient_temperature       100
_diffrn_radiation_wavelength      1.54184
_diffrn_radiation_type            CuK\a
_diffrn_radiation_source          'fine-focus sealed tube'
_diffrn_radiation_monochromator   graphite
_diffrn_measurement_device_type   'Oxford Gemini S'
_diffrn_measurement_method        ?
_diffrn_detector_area_resol_mean  16.2879
_diffrn_standards_number          ?
_diffrn_standards_interval_count  ?
_diffrn_standards_interval_time   ?
_diffrn_standards_decay_%         ?
_diffrn_reflns_number             31981
_diffrn_reflns_av_R_equivalents   0.0296
_diffrn_reflns_av_sigmaI/netI     0.0277
_diffrn_reflns_limit_h_min        -37
_diffrn_reflns_limit_h_max        37
_diffrn_reflns_limit_k_min        -37
_diffrn_reflns_limit_k_max        37
_diffrn_reflns_limit_l_min        -6
_diffrn_reflns_limit_l_max        5
_diffrn_reflns_theta_min          3.75
_diffrn_reflns_theta_max          60.56
_reflns_number_total              4928
_reflns_number_gt                 3666
_reflns_threshold_expression      >2sigma(I)
 
_computing_data_collection
;
CrysAlis CCD, Oxford Diffraction Ltd.,
Version 1.171.30.5 (release 12-06-2006 CrysAlis171 .NET)
(compiled Jun 12 2006,17:01:16)
;
_computing_cell_refinement
;
CrysAlis RED, Oxford Diffraction Ltd.,
Version 1.171.30.5 (release 12-06-2006 CrysAlis171 .NET)
(compiled Jun 12 2006,17:01:16)
;
_computing_data_reduction
;
CrysAlis RED, Oxford Diffraction Ltd.,
Version 1.171.30.5 (release 12-06-2006 CrysAlis171 .NET)
(compiled Jun 12 2006,17:01:16)
;

_computing_structure_solution     ?
_computing_structure_refinement   'SHELXL-97 (Sheldrick, 1997)'
_computing_molecular_graphics     ?
_computing_publication_material   ?
 
_refine_special_details           ?
_refine_ls_structure_factor_coef  Fsqd
_refine_ls_matrix_type            full
_refine_ls_weighting_scheme       calc
_refine_ls_weighting_details
 'calc w=1/[\s^2^(Fo^2^)+(0.0614P)^2^+1.6859P] where P=(Fo^2^+2Fc^2^)/3'
_atom_sites_solution_primary      direct
_atom_sites_solution_secondary    difmap
_atom_sites_solution_hydrogens    geom
_refine_ls_hydrogen_treatment     mixed
_refine_ls_extinction_method      none
_refine_ls_extinction_coef        ?
_refine_ls_number_reflns          4928
_refine_ls_number_parameters      434
_refine_ls_number_restraints      0
_refine_ls_R_factor_all           0.0596
_refine_ls_R_factor_gt            0.0410
_refine_ls_wR_factor_ref          0.1133
_refine_ls_wR_factor_gt           0.0990
_refine_ls_goodness_of_fit_ref    1.051
_refine_ls_restrained_S_all       1.051
_refine_ls_shift/su_max           0.002
_refine_ls_shift/su_mean          0.000
 
loop_
 _atom_site_label
 _atom_site_type_symbol
 _atom_site_fract_x
 _atom_site_fract_y
 _atom_site_fract_z
 _atom_site_U_iso_or_equiv
 _atom_site_adp_type
 _atom_site_occupancy
 _atom_site_symmetry_multiplicity
 _atom_site_calc_flag
 _atom_site_refinement_flags
 _atom_site_disorder_assembly
 _atom_site_disorder_group
O2 O 0.35721(3) -0.15057(3) 0.6037(2) 0.0235(3) Uani 1 1 d . . .
O4 O 0.45861(3) -0.03050(3) 1.3407(2) 0.0248(3) Uani 1 1 d . . .
O3 O 0.44346(3) -0.07960(3) 1.0959(2) 0.0248(3) Uani 1 1 d . . .
O1 O 0.30962(4) -0.14475(4) 0.8680(2) 0.0271(3) Uani 1 1 d . . .
C24 C 0.49083(5) -0.06045(5) 1.3599(3) 0.0234(5) Uani 1 1 d . . .
C21 C 0.47135(5) -0.09786(5) 1.2509(3) 0.0252(5) Uani 1 1 d . . .
C12 C 0.30860(5) -0.09165(5) 0.5661(3) 0.0237(5) Uani 1 1 d . . .
C13 C 0.27579(5) -0.07012(5) 0.6488(4) 0.0271(5) Uani 1 1 d . . .
H13 H 0.2655 -0.0767 0.7840 0.033 Uiso 1 1 calc R . .
C25 C 0.50129(6) -0.06565(6) 1.5954(3) 0.0290(5) Uani 1 1 d . . .
H25A H 0.4785 -0.0763 1.6714 0.044 Uiso 1 1 calc R . .
H25B H 0.5085 -0.0401 1.6559 0.044 Uiso 1 1 calc R . .
H25C H 0.5235 -0.0838 1.6087 0.044 Uiso 1 1 calc R . .
C15 C 0.36718(5) -0.18102(5) 0.7659(3) 0.0235(5) Uani 1 1 d . . .
C16 C 0.38045(6) -0.21886(6) 0.6513(4) 0.0322(5) Uani 1 1 d . . .
H16A H 0.3586 -0.2292 0.5666 0.048 Uiso 1 1 calc R . .
H16B H 0.3884 -0.2385 0.7561 0.048 Uiso 1 1 calc R . .
H16C H 0.4027 -0.2129 0.5584 0.048 Uiso 1 1 calc R . .
C4 C 0.19961(6) 0.04757(5) 0.0638(4) 0.0308(5) Uani 1 1 d . . .
C14 C 0.25840(5) -0.03903(5) 0.5312(4) 0.0317(6) Uani 1 1 d . . .
H14 H 0.2368 -0.0251 0.5895 0.038 Uiso 1 1 calc R . .
C11 C 0.32356(5) -0.07944(5) 0.3660(4) 0.0275(5) Uani 1 1 d . . .
H11 H 0.3459 -0.0925 0.3093 0.033 Uiso 1 1 calc R . .
C3 C 0.21423(5) 0.05749(5) -0.1412(4) 0.0300(5) Uani 1 1 d . . .
H3 H 0.2373 0.0450 -0.1928 0.036 Uiso 1 1 calc R . .
C23 C 0.50028(6) -0.12426(6) 1.1275(4) 0.0323(5) Uani 1 1 d . . .
H23A H 0.5157 -0.1081 1.0297 0.048 Uiso 1 1 calc R . .
H23B H 0.4855 -0.1440 1.0474 0.048 Uiso 1 1 calc R . .
H23C H 0.5180 -0.1374 1.2272 0.048 Uiso 1 1 calc R . .
C10 C 0.30625(6) -0.04852(6) 0.2490(4) 0.0305(5) Uani 1 1 d . . .
H10 H 0.3172 -0.0411 0.1166 0.037 Uiso 1 1 calc R . .
C17 C 0.40109(6) -0.16416(6) 0.9007(4) 0.0306(5) Uani 1 1 d . . .
H17A H 0.3922 -0.1402 0.9723 0.046 Uiso 1 1 calc R . .
H17B H 0.4234 -0.1580 0.8088 0.046 Uiso 1 1 calc R . .
H17C H 0.4091 -0.1836 1.0065 0.046 Uiso 1 1 calc R . .
C18 C 0.32722(5) -0.18483(5) 0.8940(3) 0.0243(5) Uani 1 1 d . . .
C7 C 0.21864(6) 0.01871(6) 0.2113(4) 0.0362(6) Uani 1 1 d . . .
H7 H 0.2045 0.0120 0.3356 0.043 Uiso 1 1 calc R . .
C22 C 0.44658(6) -0.12272(6) 1.4073(4) 0.0331(5) Uani 1 1 d . . .
H22A H 0.4287 -0.1055 1.4855 0.050 Uiso 1 1 calc R . .
H22B H 0.4641 -0.1361 1.5070 0.050 Uiso 1 1 calc R . .
H22C H 0.4313 -0.1423 1.3283 0.050 Uiso 1 1 calc R . .
C9 C 0.27282(6) -0.02849(5) 0.3275(4) 0.0292(5) Uani 1 1 d . . .
C28 C 0.39363(6) 0.02319(6) 1.1518(4) 0.0352(6) Uani 1 1 d . . .
H28 H 0.4042 0.0303 1.2855 0.042 Uiso 1 1 calc R . .
C1 C 0.16053(6) 0.10428(6) -0.1937(4) 0.0339(6) Uani 1 1 d . . .
H1 H 0.1475 0.1233 -0.2785 0.041 Uiso 1 1 calc R . .
C32 C 0.38709(6) -0.02322(7) 0.8614(4) 0.0354(6) Uani 1 1 d . . .
H32 H 0.3930 -0.0478 0.7980 0.042 Uiso 1 1 calc R . .
C19 C 0.29761(6) -0.21387(6) 0.7924(4) 0.0350(6) Uani 1 1 d . . .
H19A H 0.2946 -0.2077 0.6418 0.053 Uiso 1 1 calc R . .
H19B H 0.2721 -0.2115 0.8632 0.053 Uiso 1 1 calc R . .
H19C H 0.3074 -0.2408 0.8081 0.053 Uiso 1 1 calc R . .
C20 C 0.33249(6) -0.19383(6) 1.1312(4) 0.0323(5) Uani 1 1 d . . .
H20A H 0.3513 -0.1752 1.1927 0.048 Uiso 1 1 calc R . .
H20B H 0.3424 -0.2207 1.1483 0.048 Uiso 1 1 calc R . .
H20C H 0.3071 -0.1913 1.2034 0.048 Uiso 1 1 calc R . .
C27 C 0.40410(5) -0.01372(5) 1.0605(4) 0.0261(5) Uani 1 1 d . . .
C38 C 0.23639(6) 0.17178(6) 0.3383(4) 0.0368(6) Uani 1 1 d . . .
H38 H 0.2187 0.1895 0.2724 0.044 Uiso 1 1 calc R . .
C37 C 0.25134(6) 0.17986(7) 0.5402(4) 0.0417(6) Uani 1 1 d . . .
H37 H 0.2441 0.2035 0.6100 0.050 Uiso 1 1 calc R . .
C26 C 0.52647(5) -0.04375(6) 1.2360(4) 0.0305(5) Uani 1 1 d . . .
H26A H 0.5194 -0.0406 1.0866 0.046 Uiso 1 1 calc R . .
H26B H 0.5487 -0.0619 1.2481 0.046 Uiso 1 1 calc R . .
H26C H 0.5338 -0.0182 1.2950 0.046 Uiso 1 1 calc R . .
C8 C 0.25372(6) 0.00151(6) 0.1844(4) 0.0362(6) Uani 1 1 d . . .
H8 H 0.2681 0.0090 0.0621 0.043 Uiso 1 1 calc R . .
C31 C 0.36160(6) 0.00303(8) 0.7555(4) 0.0512(7) Uani 1 1 d . A .
H31 H 0.3509 -0.0041 0.6222 0.061 Uiso 1 1 calc R . .
C39 C 0.24784(6) 0.13705(6) 0.2338(4) 0.0380(6) Uani 1 1 d . . .
H39 H 0.2383 0.1315 0.0959 0.046 Uiso 1 1 calc R . .
C2 C 0.19478(5) 0.08570(5) -0.2687(4) 0.0301(5) Uani 1 1 d . . .
H2 H 0.2048 0.0921 -0.4046 0.036 Uiso 1 1 calc R . .
C5 C 0.16485(6) 0.06670(6) 0.1344(4) 0.0344(5) Uani 1 1 d . . .
H5 H 0.1544 0.0605 0.2696 0.041 Uiso 1 1 calc R . .
C29 C 0.36794(6) 0.04916(7) 1.0470(5) 0.0511(8) Uani 1 1 d . A .
H29 H 0.3613 0.0734 1.1127 0.061 Uiso 1 1 calc R . .
C36 C 0.27697(7) 0.15346(8) 0.6403(4) 0.0500(7) Uani 1 1 d . A .
H36 H 0.2870 0.1595 0.7767 0.060 Uiso 1 1 calc R . .
B1 B 0.32561(6) -0.12894(6) 0.6838(4) 0.0228(5) Uani 1 1 d . . .
C6 C 0.14572(6) 0.09459(6) 0.0078(4) 0.0371(6) Uani 1 1 d . . .
H6 H 0.1226 0.1070 0.0583 0.044 Uiso 1 1 calc R . .
C30 C 0.35176(6) 0.04022(8) 0.8472(6) 0.0586(9) Uani 1 1 d . . .
C40 C 0.27345(6) 0.11083(6) 0.3346(5) 0.0471(7) Uani 1 1 d . A .
H40 H 0.2812 0.0876 0.2625 0.057 Uiso 1 1 calc R . .
C35 C 0.28816(6) 0.11783(7) 0.5402(6) 0.0525(8) Uani 1 1 d . . .
B2 B 0.43542(6) -0.04175(6) 1.1695(4) 0.0240(5) Uani 1 1 d . . .
C33 C 0.32609(15) 0.0603(3) 0.6705(13) 0.033(2) Uani 0.525(14) 1 d P A 1
H33 H 0.3205 0.0477 0.5400 0.040 Uiso 0.525(14) 1 calc PR A 1
C34 C 0.31265(16) 0.0961(3) 0.7149(13) 0.031(2) Uani 0.525(14) 1 d P A 1
H34 H 0.3177 0.1080 0.8479 0.037 Uiso 0.525(14) 1 calc PR A 1
C34A C 0.31354(15) 0.0810(2) 0.5866(16) 0.023(2) Uani 0.475(14) 1 d P A 2
H34A H 0.3197 0.0624 0.4795 0.027 Uiso 0.475(14) 1 calc PR A 2
C33A C 0.32668(16) 0.0766(2) 0.7920(15) 0.022(2) Uani 0.475(14) 1 d P A 2
H33A H 0.3204 0.0956 0.8969 0.026 Uiso 0.475(14) 1 calc PR A 2
 
loop_
 _atom_site_aniso_label
 _atom_site_aniso_U_11
 _atom_site_aniso_U_22
 _atom_site_aniso_U_33
 _atom_site_aniso_U_23
 _atom_site_aniso_U_13
 _atom_site_aniso_U_12
O2 0.0250(6) 0.0247(6) 0.0208(9) 0.0042(6) 0.0005(6) 0.0027(5)
O4 0.0253(6) 0.0230(6) 0.0262(9) -0.0011(6) -0.0009(6) 0.0014(5)
O3 0.0262(6) 0.0266(7) 0.0216(9) -0.0011(6) -0.0036(6) -0.0002(5)
O1 0.0289(7) 0.0255(7) 0.0269(10) 0.0022(6) 0.0037(6) 0.0049(5)
C24 0.0233(9) 0.0257(9) 0.0212(14) -0.0005(9) 0.0010(8) 0.0026(7)
C21 0.0265(9) 0.0274(10) 0.0217(14) 0.0020(9) -0.0017(9) 0.0004(7)
C12 0.0236(9) 0.0224(9) 0.0252(14) -0.0010(9) -0.0037(9) -0.0034(7)
C13 0.0255(10) 0.0241(9) 0.0316(15) -0.0030(9) -0.0003(9) -0.0033(7)
C25 0.0293(10) 0.0297(10) 0.0280(15) -0.0027(9) -0.0009(9) 0.0018(8)
C15 0.0283(10) 0.0227(9) 0.0194(13) 0.0042(8) -0.0026(9) 0.0009(7)
C16 0.0376(11) 0.0305(10) 0.0286(15) 0.0013(9) -0.0016(10) 0.0085(8)
C4 0.0320(11) 0.0219(10) 0.0386(16) 0.0058(9) -0.0094(10) -0.0072(8)
C14 0.0218(9) 0.0228(10) 0.0506(17) -0.0095(10) -0.0042(10) 0.0030(7)
C11 0.0241(9) 0.0279(10) 0.0306(15) -0.0008(9) -0.0020(9) -0.0003(8)
C3 0.0204(9) 0.0246(10) 0.0451(17) -0.0042(10) -0.0019(10) -0.0003(7)
C23 0.0355(11) 0.0291(10) 0.0322(15) -0.0023(10) -0.0025(10) 0.0040(8)
C10 0.0319(10) 0.0291(10) 0.0305(15) 0.0054(10) -0.0053(9) -0.0055(8)
C17 0.0269(10) 0.0304(10) 0.0343(16) 0.0055(10) -0.0043(9) -0.0020(8)
C18 0.0279(10) 0.0219(9) 0.0232(14) 0.0034(8) -0.0007(9) 0.0017(7)
C7 0.0364(11) 0.0293(10) 0.0428(17) 0.0032(10) -0.0004(10) -0.0061(9)
C22 0.0363(11) 0.0312(10) 0.0319(16) 0.0036(10) -0.0016(10) -0.0064(8)
C9 0.0298(10) 0.0234(9) 0.0344(16) 0.0033(9) -0.0071(10) -0.0074(8)
C28 0.0265(10) 0.0305(11) 0.0486(17) 0.0024(10) 0.0070(10) -0.0009(8)
C1 0.0337(11) 0.0260(10) 0.0419(17) 0.0075(10) -0.0031(10) 0.0038(8)
C32 0.0248(10) 0.0495(12) 0.0319(16) 0.0068(11) 0.0005(10) -0.0078(9)
C19 0.0330(11) 0.0302(10) 0.0419(17) 0.0066(10) -0.0086(10) -0.0052(8)
C20 0.0345(11) 0.0344(11) 0.0278(16) 0.0048(10) 0.0042(10) 0.0024(8)
C27 0.0219(9) 0.0298(10) 0.0266(15) 0.0038(9) 0.0047(9) -0.0043(7)
C38 0.0303(10) 0.0319(11) 0.0483(18) 0.0128(11) -0.0026(11) 0.0013(9)
C37 0.0411(12) 0.0402(12) 0.0440(18) -0.0049(11) 0.0087(12) -0.0075(10)
C26 0.0251(10) 0.0316(10) 0.0349(15) 0.0012(10) 0.0007(9) -0.0041(8)
C8 0.0380(12) 0.0262(10) 0.0445(17) 0.0019(10) 0.0000(11) -0.0071(9)
C31 0.0243(11) 0.084(2) 0.0450(19) 0.0358(15) -0.0079(11) -0.0121(11)
C39 0.0427(12) 0.0392(12) 0.0322(16) 0.0000(10) 0.0041(11) -0.0135(10)
C2 0.0307(10) 0.0290(10) 0.0307(15) 0.0048(9) 0.0005(9) -0.0056(8)
C5 0.0353(11) 0.0351(11) 0.0328(16) 0.0044(10) 0.0014(10) -0.0069(9)
C29 0.0247(11) 0.0347(12) 0.094(3) 0.0187(14) 0.0144(14) 0.0044(9)
C36 0.0395(13) 0.0722(18) 0.0382(19) 0.0183(14) -0.0075(12) -0.0214(12)
B1 0.0217(10) 0.0248(10) 0.0218(16) -0.0033(10) -0.0023(10) -0.0037(8)
C6 0.0292(11) 0.0369(11) 0.0451(18) -0.0004(11) 0.0043(11) 0.0033(9)
C30 0.0168(10) 0.0649(17) 0.094(3) 0.0534(17) 0.0023(13) -0.0017(11)
C40 0.0326(12) 0.0251(11) 0.084(2) 0.0018(12) 0.0200(14) -0.0014(9)
C35 0.0195(10) 0.0492(15) 0.089(3) 0.0396(16) -0.0023(13) -0.0065(9)
B2 0.0225(10) 0.0275(11) 0.0221(16) -0.0005(10) 0.0059(10) -0.0043(8)
C33 0.031(2) 0.036(4) 0.033(5) -0.003(3) 0.000(2) -0.008(3)
C34 0.026(2) 0.034(4) 0.032(4) -0.002(3) 0.003(2) -0.007(3)
C34A 0.025(2) 0.019(3) 0.024(5) 0.000(3) 0.001(2) -0.001(2)
C33A 0.021(2) 0.024(3) 0.019(5) 0.000(3) 0.001(2) 0.000(2)
 
_geom_special_details   ?

loop_
 _geom_bond_atom_site_label_1
 _geom_bond_atom_site_label_2
 _geom_bond_distance
 _geom_bond_site_symmetry_2
 _geom_bond_publ_flag
O2 B1 1.370(2) . ?
O2 C15 1.466(2) . ?
O4 B2 1.364(3) . ?
O4 C24 1.472(2) . ?
O3 B2 1.368(2) . ?
O3 C21 1.468(2) . ?
O1 B1 1.365(3) . ?
O1 C18 1.468(2) . ?
C24 C25 1.509(3) . ?
C24 C26 1.520(3) . ?
C24 C21 1.560(3) . ?
C21 C23 1.513(3) . ?
C21 C22 1.519(3) . ?
C12 C11 1.396(3) . ?
C12 C13 1.405(3) . ?
C12 B1 1.548(3) . ?
C13 C14 1.393(3) . ?
C15 C17 1.513(3) . ?
C15 C16 1.514(3) . ?
C15 C18 1.555(3) . ?
C4 C5 1.393(3) . ?
C4 C3 1.399(3) . ?
C4 C7 1.470(3) . ?
C14 C9 1.394(3) . ?
C11 C10 1.386(3) . ?
C3 C2 1.389(3) . ?
C10 C9 1.387(3) . ?
C18 C20 1.509(3) . ?
C18 C19 1.519(3) . ?
C7 C8 1.313(3) . ?
C9 C8 1.480(3) . ?
C28 C29 1.380(3) . ?
C28 C27 1.398(3) . ?
C1 C6 1.380(3) . ?
C1 C2 1.380(3) . ?
C32 C31 1.385(3) . ?
C32 C27 1.393(3) . ?
C27 B2 1.555(3) . ?
C38 C37 1.372(3) . ?
C38 C39 1.380(3) . ?
C37 C36 1.374(3) . ?
C31 C30 1.403(4) . ?
C39 C40 1.372(3) . ?
C5 C6 1.373(3) . ?
C29 C30 1.382(4) . ?
C36 C35 1.390(4) . ?
C30 C33A 1.513(8) . ?
C30 C33 1.541(9) . ?
C40 C35 1.384(4) . ?
C35 C34A 1.519(8) . ?
C35 C34 1.537(9) . ?
C33 C34 1.303(17) . ?
C34A C33A 1.352(18) . ?
 
loop_
 _geom_angle_atom_site_label_1
 _geom_angle_atom_site_label_2
 _geom_angle_atom_site_label_3
 _geom_angle
 _geom_angle_site_symmetry_1
 _geom_angle_site_symmetry_3
 _geom_angle_publ_flag
B1 O2 C15 106.91(15) . . ?
B2 O4 C24 106.84(14) . . ?
B2 O3 C21 106.80(15) . . ?
B1 O1 C18 106.68(14) . . ?
O4 C24 C25 108.95(15) . . ?
O4 C24 C26 106.32(14) . . ?
C25 C24 C26 110.42(16) . . ?
O4 C24 C21 101.77(13) . . ?
C25 C24 C21 114.97(16) . . ?
C26 C24 C21 113.60(17) . . ?
O3 C21 C23 108.36(17) . . ?
O3 C21 C22 107.37(14) . . ?
C23 C21 C22 110.54(16) . . ?
O3 C21 C24 102.40(14) . . ?
C23 C21 C24 114.73(15) . . ?
C22 C21 C24 112.79(17) . . ?
C11 C12 C13 116.91(18) . . ?
C11 C12 B1 121.39(17) . . ?
C13 C12 B1 121.58(19) . . ?
C14 C13 C12 120.9(2) . . ?
O2 C15 C17 106.84(14) . . ?
O2 C15 C16 108.80(16) . . ?
C17 C15 C16 110.47(15) . . ?
O2 C15 C18 102.20(13) . . ?
C17 C15 C18 112.91(17) . . ?
C16 C15 C18 114.92(15) . . ?
C5 C4 C3 117.75(19) . . ?
C5 C4 C7 117.7(2) . . ?
C3 C4 C7 124.59(19) . . ?
C13 C14 C9 121.11(18) . . ?
C10 C11 C12 122.12(18) . . ?
C2 C3 C4 120.87(18) . . ?
C11 C10 C9 120.7(2) . . ?
O1 C18 C20 109.52(16) . . ?
O1 C18 C19 105.98(14) . . ?
C20 C18 C19 110.58(17) . . ?
O1 C18 C15 102.26(14) . . ?
C20 C18 C15 114.35(16) . . ?
C19 C18 C15 113.43(17) . . ?
C8 C7 C4 126.3(2) . . ?
C10 C9 C14 118.19(18) . . ?
C10 C9 C8 117.5(2) . . ?
C14 C9 C8 124.30(19) . . ?
C29 C28 C27 121.1(2) . . ?
C6 C1 C2 119.7(2) . . ?
C31 C32 C27 121.7(2) . . ?
C32 C27 C28 117.13(19) . . ?
C32 C27 B2 121.35(19) . . ?
C28 C27 B2 121.4(2) . . ?
C37 C38 C39 119.4(2) . . ?
C38 C37 C36 120.7(2) . . ?
C7 C8 C9 127.0(2) . . ?
C32 C31 C30 120.7(3) . . ?
C40 C39 C38 119.6(2) . . ?
C1 C2 C3 120.0(2) . . ?
C6 C5 C4 121.2(2) . . ?
C28 C29 C30 121.8(2) . . ?
C37 C36 C35 120.9(3) . . ?
O1 B1 O2 113.55(17) . . ?
O1 B1 C12 124.08(17) . . ?
O2 B1 C12 122.28(19) . . ?
C5 C6 C1 120.6(2) . . ?
C29 C30 C31 117.5(2) . . ?
C29 C30 C33A 104.2(4) . . ?
C31 C30 C33A 138.4(5) . . ?
C29 C30 C33 139.3(4) . . ?
C31 C30 C33 103.1(4) . . ?
C33A C30 C33 35.4(2) . . ?
C39 C40 C35 122.1(2) . . ?
C40 C35 C36 117.3(2) . . ?
C40 C35 C34A 103.6(4) . . ?
C36 C35 C34A 139.1(5) . . ?
C40 C35 C34 139.1(4) . . ?
C36 C35 C34 103.4(4) . . ?
C34A C35 C34 35.8(2) . . ?
O4 B2 O3 113.65(17) . . ?
O4 B2 C27 123.50(17) . . ?
O3 B2 C27 122.80(19) . . ?
C34 C33 C30 116.0(8) . . ?
C33 C34 C35 117.8(8) . . ?
C33A C34A C35 116.4(8) . . ?
C34A C33A C30 118.5(8) . . ?
 
loop_
 _geom_torsion_atom_site_label_1
 _geom_torsion_atom_site_label_2
 _geom_torsion_atom_site_label_3
 _geom_torsion_atom_site_label_4
 _geom_torsion
 _geom_torsion_site_symmetry_1
 _geom_torsion_site_symmetry_2
 _geom_torsion_site_symmetry_3
 _geom_torsion_site_symmetry_4
 _geom_torsion_publ_flag
B2 O4 C24 C25 -146.59(16) . . . . ?
B2 O4 C24 C26 94.39(18) . . . . ?
B2 O4 C24 C21 -24.76(19) . . . . ?
B2 O3 C21 C23 -144.39(16) . . . . ?
B2 O3 C21 C22 96.20(17) . . . . ?
B2 O3 C21 C24 -22.77(18) . . . . ?
O4 C24 C21 O3 28.50(17) . . . . ?
C25 C24 C21 O3 146.08(15) . . . . ?
C26 C24 C21 O3 -85.34(18) . . . . ?
O4 C24 C21 C23 145.65(17) . . . . ?
C25 C24 C21 C23 -96.8(2) . . . . ?
C26 C24 C21 C23 31.8(2) . . . . ?
O4 C24 C21 C22 -86.58(18) . . . . ?
C25 C24 C21 C22 31.0(2) . . . . ?
C26 C24 C21 C22 159.58(16) . . . . ?
C11 C12 C13 C14 2.2(3) . . . . ?
B1 C12 C13 C14 -173.82(17) . . . . ?
B1 O2 C15 C17 -95.95(17) . . . . ?
B1 O2 C15 C16 144.77(16) . . . . ?
B1 O2 C15 C18 22.84(18) . . . . ?
C12 C13 C14 C9 0.4(3) . . . . ?
C13 C12 C11 C10 -2.3(3) . . . . ?
B1 C12 C11 C10 173.79(17) . . . . ?
C5 C4 C3 C2 0.5(3) . . . . ?
C7 C4 C3 C2 -178.74(18) . . . . ?
C12 C11 C10 C9 -0.4(3) . . . . ?
B1 O1 C18 C20 146.00(16) . . . . ?
B1 O1 C18 C19 -94.69(18) . . . . ?
B1 O1 C18 C15 24.36(19) . . . . ?
O2 C15 C18 O1 -28.35(17) . . . . ?
C17 C15 C18 O1 86.06(18) . . . . ?
C16 C15 C18 O1 -146.00(16) . . . . ?
O2 C15 C18 C20 -146.62(15) . . . . ?
C17 C15 C18 C20 -32.2(2) . . . . ?
C16 C15 C18 C20 95.7(2) . . . . ?
O2 C15 C18 C19 85.31(17) . . . . ?
C17 C15 C18 C19 -160.29(16) . . . . ?
C16 C15 C18 C19 -32.3(2) . . . . ?
C5 C4 C7 C8 -171.4(2) . . . . ?
C3 C4 C7 C8 7.9(3) . . . . ?
C11 C10 C9 C14 3.0(3) . . . . ?
C11 C10 C9 C8 -174.28(17) . . . . ?
C13 C14 C9 C10 -3.1(3) . . . . ?
C13 C14 C9 C8 174.06(18) . . . . ?
C31 C32 C27 C28 1.4(3) . . . . ?
C31 C32 C27 B2 -174.86(18) . . . . ?
C29 C28 C27 C32 -0.8(3) . . . . ?
C29 C28 C27 B2 175.45(18) . . . . ?
C39 C38 C37 C36 -1.1(3) . . . . ?
C4 C7 C8 C9 -178.03(19) . . . . ?
C10 C9 C8 C7 167.9(2) . . . . ?
C14 C9 C8 C7 -9.3(3) . . . . ?
C27 C32 C31 C30 -0.5(3) . . . . ?
C37 C38 C39 C40 1.1(3) . . . . ?
C6 C1 C2 C3 -0.2(3) . . . . ?
C4 C3 C2 C1 -0.1(3) . . . . ?
C3 C4 C5 C6 -0.5(3) . . . . ?
C7 C4 C5 C6 178.78(19) . . . . ?
C27 C28 C29 C30 -0.7(3) . . . . ?
C38 C37 C36 C35 -0.4(3) . . . . ?
C18 O1 B1 O2 -11.1(2) . . . . ?
C18 O1 B1 C12 165.36(17) . . . . ?
C15 O2 B1 O1 -8.5(2) . . . . ?
C15 O2 B1 C12 175.00(16) . . . . ?
C11 C12 B1 O1 -173.00(17) . . . . ?
C13 C12 B1 O1 2.9(3) . . . . ?
C11 C12 B1 O2 3.2(3) . . . . ?
C13 C12 B1 O2 179.06(17) . . . . ?
C4 C5 C6 C1 0.2(3) . . . . ?
C2 C1 C6 C5 0.2(3) . . . . ?
C28 C29 C30 C31 1.6(3) . . . . ?
C28 C29 C30 C33A -178.8(2) . . . . ?
C28 C29 C30 C33 -173.6(3) . . . . ?
C32 C31 C30 C29 -1.0(3) . . . . ?
C32 C31 C30 C33A 179.5(3) . . . . ?
C32 C31 C30 C33 175.8(2) . . . . ?
C38 C39 C40 C35 0.5(3) . . . . ?
C39 C40 C35 C36 -2.0(3) . . . . ?
C39 C40 C35 C34A 178.2(2) . . . . ?
C39 C40 C35 C34 172.3(3) . . . . ?
C37 C36 C35 C40 1.9(3) . . . . ?
C37 C36 C35 C34A -178.4(3) . . . . ?
C37 C36 C35 C34 -174.2(2) . . . . ?
C24 O4 B2 O3 11.7(2) . . . . ?
C24 O4 B2 C27 -165.63(17) . . . . ?
C21 O3 B2 O4 8.0(2) . . . . ?
C21 O3 B2 C27 -174.60(17) . . . . ?
C32 C27 B2 O4 166.74(18) . . . . ?
C28 C27 B2 O4 -9.4(3) . . . . ?
C32 C27 B2 O3 -10.4(3) . . . . ?
C28 C27 B2 O3 173.51(18) . . . . ?
C29 C30 C33 C34 -4.5(6) . . . . ?
C31 C30 C33 C34 179.9(3) . . . . ?
C33A C30 C33 C34 4.2(4) . . . . ?
C30 C33 C34 C35 177.9(3) . . . . ?
C40 C35 C34 C33 2.5(6) . . . . ?
C36 C35 C34 C33 177.3(3) . . . . ?
C34A C35 C34 C33 -7.4(4) . . . . ?
C40 C35 C34A C33A -169.8(3) . . . . ?
C36 C35 C34A C33A 10.5(6) . . . . ?
C34 C35 C34A C33A 3.5(3) . . . . ?
C35 C34A C33A C30 179.4(3) . . . . ?
C29 C30 C33A C34A 166.3(3) . . . . ?
C31 C30 C33A C34A -14.1(6) . . . . ?
C33 C30 C33A C34A -7.8(4) . . . . ?
 
_diffrn_measured_fraction_theta_max    0.952
_diffrn_reflns_theta_full              60.56
_diffrn_measured_fraction_theta_full   0.952
_refine_diff_density_max    0.451
_refine_diff_density_min   -0.257
_refine_diff_density_rms    0.039
